# Supplementary figures and images for: The gut microbiota of non-obese Japanese pregnant women with gestational diabetes mellitus
Source: PubMed Central journal article supplement — Biosci Microbiota Food Health. 2021 Aug 13;41(1):4–11. doi: 10.12938/bmfh.2021-025 (PMC8727054; doi:10.12938/bmfh.2021-025), 2021-08-13

Supplementary Fig. 1

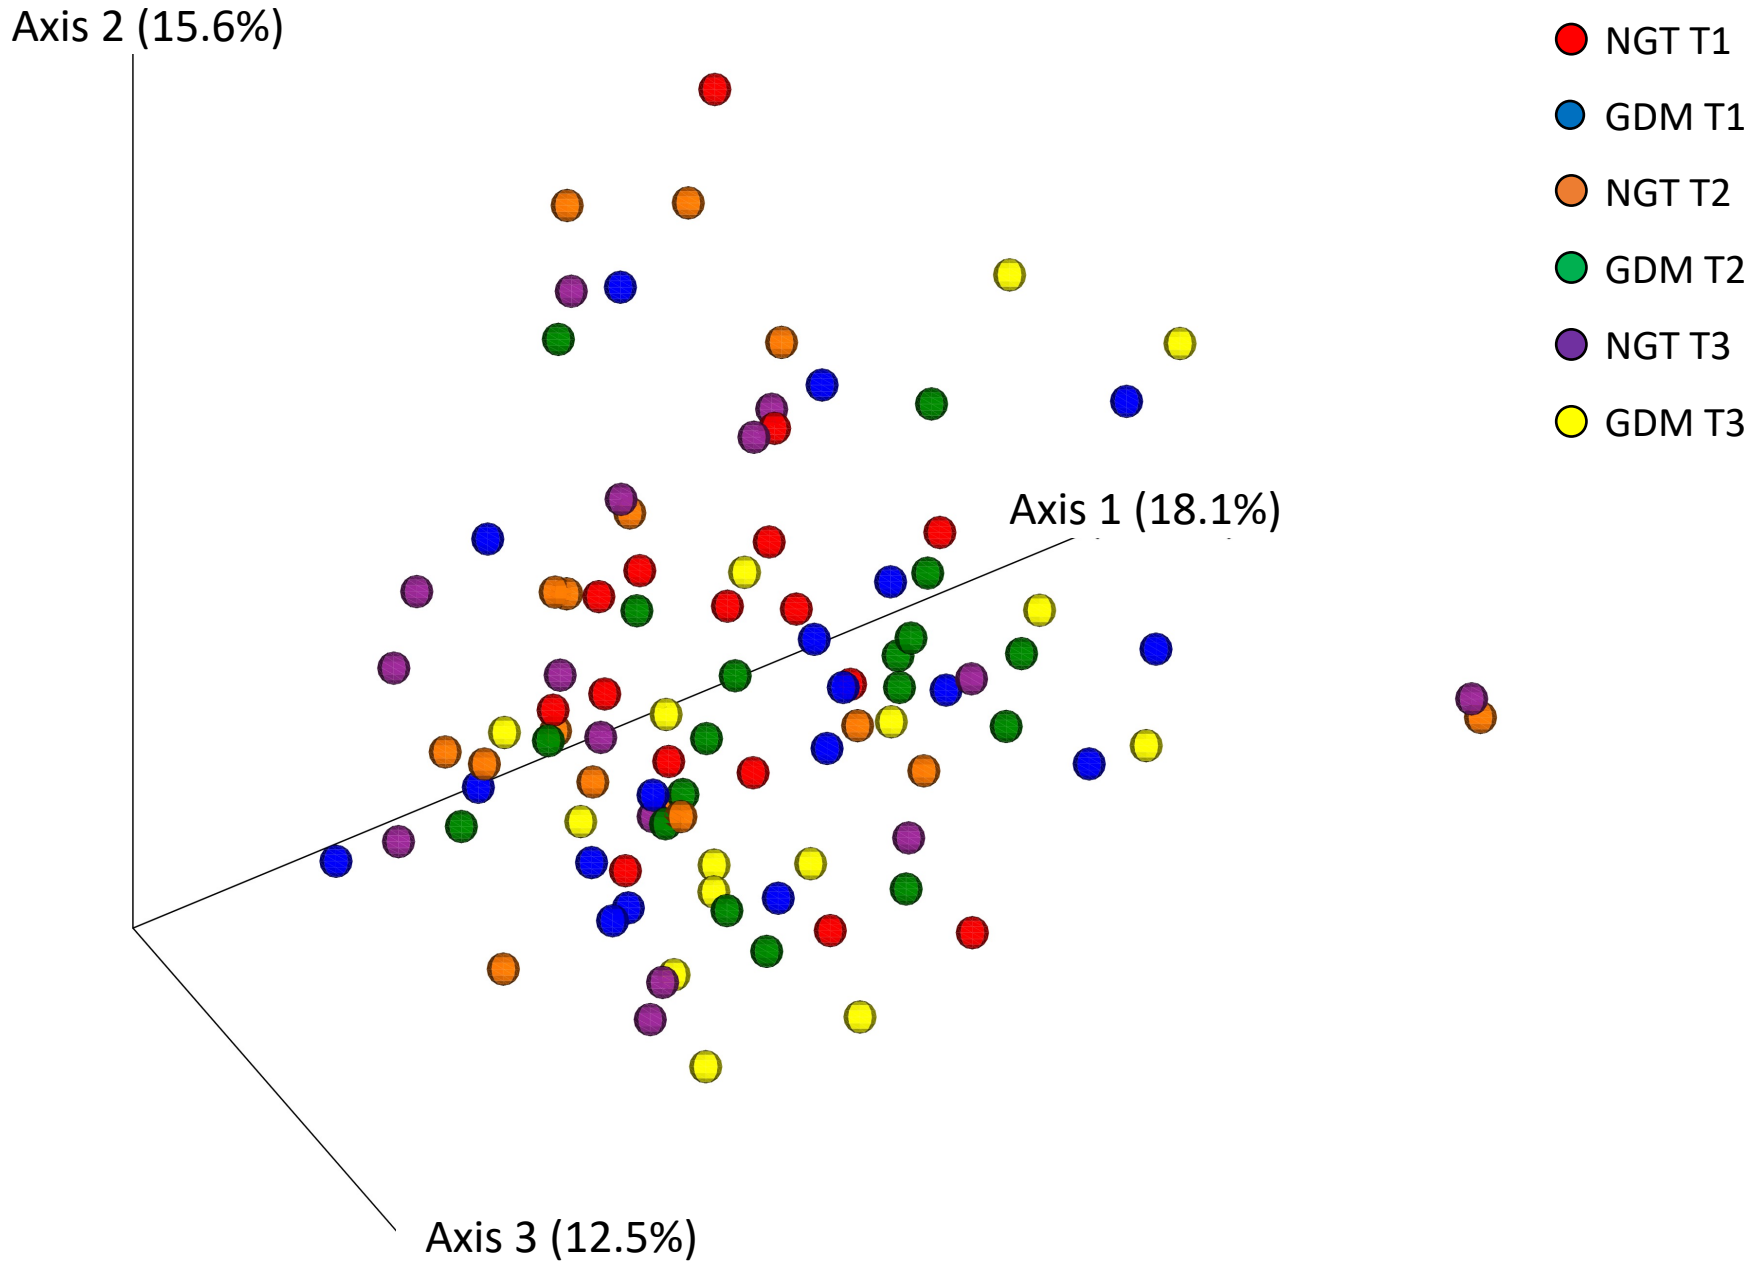

Supplement: bmfh-41-004-s001.pdf [file bmfh-41-004-s001.pdf]
